1 **A global genomic approach uncovers novel components for**  
2 **twitching motility-mediated biofilm expansion in *Pseudomonas***  
3 ***aeruginosa***

4 **Laura M. Nolan<sup>1</sup>, Cynthia B. Whitchurch<sup>2</sup>, Lars Barquist<sup>3,4</sup>, Marilyn Katrib<sup>2</sup>, Christine**  
5 **J. Boinett<sup>5,6</sup>, Matthew Mayo<sup>5</sup>, David Goulding<sup>5</sup>, Ian G. Charles<sup>7</sup>, Alain Filloux<sup>1</sup>, Julian**  
6 **Parkhill<sup>5#</sup> and Amy K. Cain<sup>5,8#</sup>**

7 <sup>1</sup>MRC Centre for Molecular Bacteriology and Infection (CMBI), Department of Life  
8 Sciences, Imperial College London, London SW7 2AZ, United Kingdom.

9 <sup>2</sup>The itthree institute, University of Technology Sydney, Ultimo, NSW, 2007, Australia.

10 <sup>3</sup>Institute for Molecular Infection Biology, University of Würzburg, Würzburg D-97080,  
11 Germany.

12 <sup>4</sup>Helmholtz Institute for RNA-based Infection Research (HIRI), Würzburg, Germany

13 <sup>5</sup>Wellcome Sanger Institute, Wellcome Genome Campus, Hinxton, Cambridge, UK.

14 <sup>6</sup>Present address: Hospital for Tropical Diseases, Wellcome Trust Major Overseas  
15 Programme, Oxford University Clinical Research Unit, Ho Chi Minh City, Vietnam.

16 <sup>7</sup>Quadram Institute of Bioscience, Norwich Research Park, Norwich, Norfolk, NR4 7UA,  
17 United Kingdom.

18 <sup>8</sup>Present address: Chemical and Biomolecular Sciences, Macquarie University, Sydney,  
19 NSW, Australia

20 <sup>#</sup>Address correspondence to: Julian Parkhill ([parkhill@sanger.ac.uk](mailto:parkhill@sanger.ac.uk)) or Amy K. Cain  
21 ([amy.cain@mq.edu.au](mailto:amy.cain@mq.edu.au))

22

23

24 **Abstract**

25 *Pseudomonas aeruginosa* is an extremely successful pathogen able to cause both  
26 acute and chronic infections in a range of hosts, utilizing a diverse arsenal of cell-associated  
27 and secreted virulence factors. A major cell-associated virulence factor, the Type IV pilus  
28 (T4P), is required for epithelial cell adherence and mediates a form of surface translocation  
29 termed twitching motility, which is necessary to establish a mature biofilm and actively  
30 expand these biofilms. *P. aeruginosa* twitching motility-mediated biofilm expansion is a  
31 coordinated, multicellular behaviour, allowing cells to rapidly colonize surfaces, including  
32 implanted medical devices. Although at least 44 proteins are known to be involved in the  
33 biogenesis, assembly and regulation of the T4P, with additional regulatory components and  
34 pathways implicated, it is unclear how these components and pathways interact to control  
35 these processes. In the current study, we used a global genomics-based random-mutagenesis  
36 technique, transposon directed insertion-site sequencing (TraDIS), coupled with a physical  
37 segregation approach, to identify all genes implicated in twitching motility-mediated biofilm  
38 expansion in *P. aeruginosa*. Our approach allowed identification of both known and novel  
39 genes, providing new insight into the complex molecular network that regulates this process  
40 in *P. aeruginosa*. Additionally, our data suggests a differential effect on twitching motility by  
41 flagellum components based upon their cellular location. Overall the success of our TraDIS  
42 approach supports the use of this global genomic technique for investigating virulence genes  
43 in bacterial pathogens.

44

45

46

47

48

49

## 50 **Introduction**

51 *P. aeruginosa* is a leading cause of health-care associated infections and is the major  
52 cause of mortality in patients with cystic fibrosis (CF) (1). This bacterium's success as a  
53 pathogen is mainly attributed to its ability to produce a plethora of cell-associated and  
54 secreted virulence factors (2). Type IV pili (T4P) are major cell-associated virulence factors  
55 of *P. aeruginosa*, promoting both attachment to host epithelial cells and a form of flagella-  
56 independent surface translocation, termed twitching motility (3). Twitching motility is a  
57 complex and co-ordinated multicellular phenomenon, which in *P. aeruginosa*, results in  
58 active biofilm expansion (4, 5). This active expansion can result in the spread of infection  
59 within host tissues and along implanted medical devices (6, 7).

60 The biogenesis, assembly and regulation of the T4P for mediating twitching motility-  
61 mediated biofilm expansion requires at least 44 different proteins (3, 4, 8). The components  
62 involved in biogenesis and assembly of T4P are encoded by *pilA, B, C, D, E, F, M, N, O, P,*  
63 *Q, T, U, V, W, X, Y1, Y2, Z,* and *fimT, U, V*. The T4P is composed of multiple PilA  
64 monomers, which are assembled by the T4P biogenesis machinery. This machinery is  
65 composed of the motor, alignment and pilus subcomplexes (3). At the inner membrane, the  
66 motor subcomplex is composed of a platform protein PilC and the cytoplasmic ATPases  
67 PilB and PilT, which are responsible for pilus elongation and retraction, respectively (9,  
68 10). The alignment subcomplex composed of PilM, PilN and PilO forms a connection  
69 between the motor subcomplex and the outer membrane associated secretin complex of  
70 PilP and PilQ (11-14). Pilus extension is mediated by the combined activity of PilZ, FimX,  
71 and the ATPase PilB, while the ATPases PilT and/or PilU are responsible for pilus retraction  
72 (15-21).

73 Expression of these T4P genes is controlled by several systems in *P. aeruginosa*  
74 including the two-component sensor-regulator pairs, PilS/PilR (22, 23) and FimS/AlgR (24).

75 The highly complex Chp chemosensory system encoded by the *pilGHIJK-chpABC* gene  
76 cluster (25-28) is involved in regulating the motors which control T4P extension and  
77 retraction in response to environmental signals (29), and is related to the Che chemosensory  
78 signal transduction system in *E. coli* which regulates flagella-mediated chemotaxis (30).  
79 Other regulatory components include: the virulence factor regulator Vfr (homologous to the  
80 *E. coli* catabolic repressor protein (CRP)) (31, 32); FimL which appears to intersect with the  
81 Chp chemosensory system and Vfr regulatory cascade (33); Crc, the catabolic repressor  
82 control protein (34); FimX (21, 35); FimV (36); as well as PocA, PocB and TonB3 (37, 38).  
83 Additionally, the regulation of T4P biogenesis, assembly and twitching motility-mediated  
84 biofilm expansion is further complicated by the contribution of the small intracellular  
85 signalling molecules 3',5'-cyclic adenosine monophosphate (cAMP) and 3',5'-cyclic  
86 diguanylic acid (c-di-GMP) (35, 39, 40). Clearly the regulation of T4P biogenesis and  
87 assembly, and twitching motility-mediated biofilm expansion is complex, and while multiple  
88 components and signalling cascades have been implicated, it remains unclear precisely how  
89 these components and pathways intersect. Therefore, we predict that other, currently  
90 uncharacterised proteins and pathways provide the links between these known components  
91 and pathways that regulate T4P biogenesis, assembly and twitching motility.

92 Here we adapted a global genomics-based approach termed transposon directed insertion-  
93 site sequencing (TraDIS) (41, 42) to identify all genes involved in twitching motility-  
94 mediated biofilm expansion in *P. aeruginosa*. TraDIS is a powerful method which utilises  
95 high-throughput sequencing of dense random transposon mutant libraries to identify all genes  
96 involved in any selective condition (42, 43). TraDIS (and related transposon-insertion  
97 sequencing methods) has proved successful for assaying a number of phenotypes in *P.*  
98 *aeruginosa*, including antibiotic resistance (44), stress conditions (45) and *in vivo* wound  
99 infection (46). However, this is the first time TraDIS has been used to investigate biofilm

100 expansion in *P. aeruginosa*. The success of our systematic and global approach for  
101 investigating this aspect of *P. aeruginosa* virulence demonstrates that TraDIS-based  
102 separation is a powerful method to generate a comprehensive catalogue of genes involved in  
103 motility and pathogenesis-associated phenotypes, and the physical segregation approach used  
104 here can be applied more broadly to study bacterial phenotypes other than simple survival in  
105 selective conditions.

## 106 **Materials and Methods**

### 107 **Bacterial strains, media and twitching motility assays**

108 Strains used in this study were *P. aeruginosa* strain PA14, mutants from the PA14  
109 non-redundant transposon mutant library (47) (see Table S2) and *E. coli* S17-1 containing the  
110 mini-Tn5-pro plasmid (48). *P. aeruginosa* strain PAK (Filloux lab collection) was used for  
111 generation of mutant strain PAK\_05353 (orthologue of PA5037/PA14\_66580) generated by  
112 allelic exchange mutagenesis as described previously (49, 50). Additionally  
113 PA14*pilR*::mar2xT7 (47) was used as a pilin negative control for TEM analysis, and  
114 PAK $\Delta$ *pilQ* (gifted by Stephen Lory) and PAK*pilA*:TcR (51) as negative controls for Western  
115 blot analyses.

116 *P. aeruginosa* and *E. coli* were cultured on Luria–Bertani (LB) (52) broth solidified  
117 with agar at 1.5 % or 1 % (for twitching motility sub-surface assays) and grown overnight at  
118 37 °C. Cultures were grown in either cation-adjusted Mueller Hinton broth (CAMHB) or LB  
119 broth, and incubated overnight at 37 °C, with shaking at 250 rpm. Antibiotic concentrations  
120 used were gentamicin 15 µg/mL for plasmid maintenance in *E. coli* and for recovery of PA14  
121 transposon mutants from library glycerol stocks; after initial recovery of PA14 transposon  
122 mutants from glycerol no antibiotic selection was used. Twitching motility-mediated biofilm  
123 expansion was assayed in sub-surface stab assays as described previously (40). Generated  
124 TraDIS library transposon mutants were recovered on 1x Vogel-Bonner Media (VBM) (a 10x

125 solution contains (MgSO<sub>4</sub>·7H<sub>2</sub>O (8 mM), citric acid (anhydrous) (9.6 mM), K<sub>2</sub>HPO<sub>4</sub> (1.7  
126 mM), NaNH<sub>5</sub>PO<sub>4</sub>·4H<sub>2</sub>O (22.7 mM), pH 7, and filter sterilized) with 1.5 % agar containing  
127 gentamycin at 100 µg/mL.

### 128 **Planktonic growth assays**

129 Planktonic growth of *P. aeruginosa* was followed by recording changes in OD<sub>600nm</sub>  
130 for 20 h, with incubation at 37 °C and shaking at 250 rpm. Cells were grown in 96-well  
131 microtitre plates with LB to replicate the conditions in the sub-surface twitching motility  
132 assays, or minimal media (1x M63 ((NH<sub>4</sub>)<sub>2</sub>SO<sub>4</sub> (15 mM); KH<sub>2</sub>PO<sub>4</sub> (22 mM); and K<sub>2</sub>HPO<sub>4</sub> (40  
133 mM)) supplemented with MgSO<sub>4</sub> (1 mM), casamino acids (0.05%) and glucose (0.4%)) to  
134 replicate the conditions in the attachment assays.

### 135 **Submerged biofilm assays**

136 Overnight cultures were diluted to OD<sub>600nm</sub> = 0.1 into microtitre plates with 1x M63  
137 media plus supplements (as for minimal media growth assays above) and incubated statically  
138 at 37 °C for 18 h. Planktonic growth was then removed and the remaining attached cells  
139 stained with crystal violet (10% (v/v)) for at least 10 min, statically, at room temperature.  
140 Unbound crystal violet stain was removed and the plate washed twice prior to extraction of  
141 crystal violet dye with ethanol (95 %). OD<sub>600nm</sub> of the crystal violet dye was then used to  
142 quantify the levels of attached cells.

### 143 **DNA manipulation**

144 DNA isolation was performed using the PureLink Genomic DNA mini kit (Life  
145 Technologies) except for TraDIS library genomic DNA isolation (see below). Isolation of  
146 plasmid DNA was carried out using the QIAprep spin miniprep kit (Qiagen). Primers (Sigma)  
147 used are shown in Table 3. DNA fragments were amplified with either KOD Hot Start DNA  
148 Polymerase (Novagen) or standard Taq polymerase (NEB) as described by the manufacturer  
149 with the inclusion of Betaine (Sigma) or DMSO (Sigma). Restriction endonucleases were

150 used according to the manufacturer's specifications (Roche). DNA sequencing was  
151 performed by GATC Biotech.

### 152 **Preparation of samples for PilQ immunoblotting**

153 Preparation of whole cell samples for PilQ analysis were performed as described  
154 previously (28) with cells being harvested from plates grown for 20 h at 37 °C on LB agar.  
155 For analysis of PilQ multimerization samples were only boiled for 2 min at 95 °C in Laemmli  
156 loading buffer prior to loading on the SDS-PAGE gel. All other Western blot samples were  
157 boiled for 10 min at 95 °C in Laemmli loading buffer prior to loading on the SDS-PAGE gel

### 158 **Western Blot analysis**

159 SDS-PAGE and western blotting were performed as described previously (50).  
160 Proteins were resolved in 8%, 10%, 12% or 15% gels using the Mini-PROTEAN system  
161 (Bio-Rad) and transferred to Nitrocellulose membrane (GE Healthcare) by electrophoresis.  
162 Membranes were blocked in 5% milk (Sigma) before incubation with primary antibodies.  
163 Membranes were washed with TBST (0.14 M NaCl, 0.03 M KCl and 0.01 M phosphate  
164 buffer plus Tween 20 (0.05% v/v)) before incubation with HRP-conjugated secondary  
165 antibodies (Sigma). The resolved proteins on the membrane blots were detected using the  
166 Novex ECL HRP Chemiluminescent substrate (Invitrogen) or the Luminata Forte Western  
167 HRP substrate (Millipore) using a Las3000 Fuji Imager. Membranes were probed with  $\alpha$ -PilQ  
168 antibody (gifted by Stephen Lory), or  $\alpha$ -RNAP antibody (Neoclone) and secondary anti-  
169 rabbit antibody for PilQ and anti-mouse antibody for RNAP.

### 170 **Transmission Electron Microscopy (TEM) assays**

171 Log phase cultures ( $OD_{600nm}$  0.25 to 0.5) were fixed in the planktonic state with 0.1 %  
172 glutaraldehyde and then spotted on a 400 mesh copper/palladium grid. Alternatively, cells  
173 were first spotted on a grid, incubated for 15 min at room temperature, and then fixed in a  
174 surface-associated state with 0.1 % glutaraldehyde. Preparations were then washed 3 times

175 with water and negatively-stained twice with 1 % uranyl acetate. Images were taken with a  
176 FEI Morgagni 268(D) electron microscope.

### 177 **TraDIS library generation**

178 A highly saturated transposon mutant library was generated in *P. aeruginosa* PA14 by  
179 large scale conjugation with an *E. coli* SM17-1 [mini-Tn5-pro] donor which allowed for  
180 random insertion of a mariner transposon throughout the PA14 genome, and conferred  
181 gentamicin resistance in the recipient PA14 strain. The *E. coli* donor strain was grown in LB  
182 supplemented with gentamicin (15 µg/mL) overnight at 37 °C and the recipient PA14 strain  
183 was grown overnight at 37 °C in CAMHB. Equivalent amounts of both strains were spread  
184 uniformly on separate LB agar plates and incubated overnight at 37 °C for *E. coli* and at 43  
185 °C under humid conditions for *P. aeruginosa*. The next day 1 *E. coli* donor plate was  
186 harvested and combined by extensive physical mixing on a fresh LB agar plate with 1 plate of  
187 harvested recipient PA14 strain. Conjugation between the two strains was achieved by  
188 incubation of the high-density mixture of both strains at 37 °C for 2 hours. The conjugation  
189 mix was then harvested, pelleted by centrifugation (10,000 g, 10 min, 4 °C), and resuspended  
190 in LB. The resuspended cells were recovered on 1x VBM agar supplemented with gentamicin  
191 (100 µg/mL) and incubated for 17 h at 37 °C. The numbers of mutants obtained were  
192 estimated by counting a representative number of colonies across multiple plates. Mutants on  
193 plates were recovered as a pool, resuspended in LB, pelleted by centrifugation (10,000 g, 10  
194 min, 4 °C), and then resuspended in LB plus glycerol (15 % (v/v)) and stored at -80 °C. The  
195 protocol was repeated on a large scale until ~2 million mutants were obtained.

### 196 **TraDIS assay with mutant pool**

197 The transposon mutant library pool was diluted 1:10 into 9 mL CAMHB in 10  
198 separate 50 mL Falcon tubes which were covered with arosealed to facilitate aeration within  
199 the culture and incubated at 37 °C overnight. Thirty mL LB agar (1.5 %) 90 mm plates were



200 poured and allowed to set overnight at room temperature. The following morning the agar  
201 was flipped into a larger petri dish to expose the smooth underside set against the petri dish  
202 base which promotes rapid twitching motility-mediated biofilm expansion (53). 1.5 mL of  
203 overnight growth of the pooled transposon mutant library was pelleted by centrifugation  
204 (10,000 g, 3 min, 4 °C), and the whole pellet then spotted into the centre of the flipped agar  
205 plate. This was repeated for all 10 overnight cultures and performed in triplicate (i.e. a total  
206 of 30 plates). All plates were incubated under humid conditions at 37 °C for 65 h. To harvest  
207 mutants based upon their ability to undergo twitching motility-mediated biofilm expansion  
208 mutants were harvested from the inner, non-twitching zone and from the outer, active-  
209 twitching motility zone (see Figure S1A) for all 3 replicates. The cells from the inner and  
210 from the outer zones were harvested separately for all 3 replicates by resuspension in 5 mL  
211 LB, followed by centrifugation (10,000 g, 10 min, 4 °C), to pellet the cells. The supernatant  
212 was discarded and the cells used for genomic DNA extraction.

### 213 **Genomic DNA extraction for TraDIS library sequencing**

214 Genomic DNA from the harvested pooled library pellets was resuspended in 1.2 mL  
215 lysis solution (Tris-HCl (10 mM), NaCl (400 mM) and Na<sub>2</sub>EDTA (2 mM), supplemented  
216 with Proteinase K in storage buffer (Tris-HCl (50 mM), glycerol (50 % (v/v)), NaCl (100  
217 mM), EDTA (0.1 mM), CaCl<sub>2</sub> (10mM), Triton X-100 (0.1% (w/v)) and DTT (1 mM)) to a  
218 concentration of 166 µg/ml. Cell lysis was achieved by incubation at 65 °C for 1 h, with  
219 occasional vortexing. The samples were then cooled to room temperature and RNA removed  
220 by addition of RNaseA (5 µg/ml) and incubation at 37 °C for 80 min. Samples were then  
221 placed on ice for 5 min. Each lysate was then split into 2 eppendorf tubes of ~600 µL per  
222 tube, and 500 µL NaCl (3 M) added to each tube. Cell debris were removed by centrifugation  
223 (10,000 g, 10 min, 4 °C) and 500 µL from each tube was added to 2 volumes of isopropanol  
224 to precipitate DNA. DNA was then collected by centrifugation (10,000 g, 10 min, 4 °C), with

225 the pelleted DNA being washed twice in 70 % (v/v) ethanol. DNA was finally resuspended in  
226 50 µl Tris-EDTA buffer.

### 227 **Generation of DNA sequencing libraries and library sequencing**

228 TraDIS was performed using the method described in Barquist et al., (2016). The  
229 PCR primers used were designed in this study, for library construction (5':  
230 AATGATACGGCGACCACCGAGATCTACACAGGTTGAACTGCCAACGACTACG and  
231 3':  
232 AATGATACGGCGACCACCGAGATCTACACA ACTCTCTACTGTTTCTCCATACCCG)  
233 and sequencing TraDIS primers (5': CGCTAGGCGGCCAGATCTGAT, and 3':  
234 GGCTAGGCCGCGGCCGCACTTGTGTA) and during library amplification, plasmid block  
235 primers were used to prevent amplification of plasmid background (5'  
236 ctagaagaagcttgggatccgtcgaccgatcccgtacacaagtagcgtcc–dideoxy and 3'  
237 attccacaaattgttatccgctcacaattccacatgtggaattccacatgtgg–dideoxy). For the TM TraDIS  
238 sequencing, we used a MiSeq Illumina platform and 13.2 million 150 bp single-end  
239 sequencing reads were generated. Reads were mapped onto PA14 (accession number:  
240 CP000438) genome, and 10% of the 3' end of each gene was discounted, and a 10 read  
241 minimum cut-off used to be included in the comparisons performed using EdgeR (54), using  
242 scripts from the Bio-TraDIS pipeline (Barquist et al., (2016); [https://github.com/sanger-](https://github.com/sanger-pathogens/Bio-Tradis)  
243 [pathogens/Bio-Tradis](https://github.com/sanger-pathogens/Bio-Tradis)). All sequences from the TraDIS assays are available in the European  
244 Nucleotide archive (ENA) under study accession number ERP001977 and individual ENA  
245 accessions of each sample are ERS427191-3 for the non-twitching cells, ERS427194-6 for  
246 the twitching cells and ERS427197-9 for the base library without selection.

### 247 **Downstream analysis of TraDIS results**

248 KEGG enrichment analysis was performed in R. KEGG pathway annotations were  
249 retrieved using the KEGGREST package. A hypergeometric test was used to test for pathway

250 enrichment in genes with higher ( $\log_{2}FC > 4$ ,  $q\text{-value} < 0.01$ ) or lower ( $\log_{2}FC < -4$ ,  $q\text{-value} <$   
251  $0.01$ ) mutant abundance in the TraDIS assay.

## 252 **Results**

### 253 **Confirmation of genes known to be involved in twitching motility**

254 To identify genes involved in twitching motility-mediated biofilm expansion we  
255 generated a high-density random transposon mutant library in *P. aeruginosa* PA14 using  
256 conjugation of a Tn5 minipro vector and gentamicin selection. We determined that this  
257 library consisted of 310,000 unique Tn5 mutants by sequencing DNA from  $10^9$  cells from the  
258 raw base library, in duplicate, without selection.

259 Approximately  $10^9$  cells from an overnight culture of the pool of transposon mutants  
260 were concentrated and inoculated as a central spot on top of an inverted agar plate. These  
261 were incubated for 65 h at 37 °C under humid conditions to allow a twitching motility-  
262 mediated surface biofilm to form. An inverted agar plate was used to expose the smooth  
263 underside of the moist, set agar, which facilitates rapid twitching motility-mediated biofilm  
264 expansion and discourages other forms of motility (53). This colony biofilm assay was  
265 favoured over the subsurface twitching motility assay (53) as this assay allows a much greater  
266 number of cells to be recovered, thus allowing sufficient amounts of genomic DNA to be  
267 extracted for downstream sequencing. Transposon mutants were separated based upon their  
268 ability to expand via twitching motility, away from the site of inoculation, with cells being  
269 harvested from the inner, non-twitching section of the colony biofilm, and the outer, actively  
270 expanding edge (Figure S1A). The outer and inner zones from 10 plates were combined to  
271 form each replicate, and 3 replicates were performed over different days. Genomic DNA was  
272 extracted from both combined pools of mutants then separately sequenced to determine the  
273 number of insertions per gene, using a TraDIS approach, as described previously (42). The  
274 relative frequencies of transposon insertion in the non-twitching and twitching transposon

275 mutant pools were compared as described previously (42) and using a cut off of  $\log_2FC=4$   
276 and a Q-value of  $<0.01$  to identify genes with differential insertion levels during twitching  
277 motility-mediated biofilm expansion. This revealed 942 genes as having a putative role in  
278 twitching motility-mediated biofilm formation: 82 genes with increased insertions and 860  
279 with decreased insertions (Table S1). 42 of the 44 genes known to be involved in twitching  
280 motility-mediated biofilm expansion were identified (3, 4, 8) (Table 1). The two genes which  
281 we could not assay in our TraDIS screen were *rpoN* (PA14\_57940) and *pocB* (PA14\_25500)  
282 due to a minimal insertion density in these genes in our starting base library.

### 283 **Identification of novel components involved in twitching motility-mediated biofilm** 284 **expansion**

285 From our TraDIS results we selected 39 genes that had not been previously implicated  
286 in twitching motility (Table S2) to phenotypically characterize using single transposon  
287 mutants from the non-redundant PA14 transposon mutant collection (47). We tested the  
288 ability of each mutant to undergo twitching motility using a sub-surface stab assay. For those  
289 target genes that had multiple transposon mutants available, we tested all mutants, bringing  
290 the total number of assayed mutants to 52 (Table S2). From these assays, we detected 32  
291 transposon mutants which had significantly altered levels of twitching motility compared to  
292 wildtype (Figure S2).

293 We selected 11 transposon mutants to further characterize based on biological interest  
294 and especially dramatic changes in twitching ability (Table 2). The genes containing these  
295 transposon insertions appear to group into distinct functional classes including cellular  
296 metabolism, signal transduction, cytokinesis and flagella-mediated motility (Table 2).  
297 Biofilm and growth assays were conducted for these 11 selected mutants to determine  
298 whether there was any effect on submerged biofilm formation (Figure 1B) and also to  
299 determine if the observed twitching motility defect (Figure 1A) was due to a growth-related

300 effect (Figure 1C). Of these only *kinB* was found to have decreased levels of biofilm  
301 formation compared to wildtype (Figure 1B), as reported previously (55). None of these  
302 transposon mutants had an altered ability to grow in the minimal medium used for the biofilm  
303 assay demonstrating that any alteration in biofilm formation was not a result of a growth-  
304 related effect (Figure S1B). Of these 11 transposon mutants *prlC*, *lon*, *kinB*, *fliF* and *fliG* had  
305 significant alterations in growth rate in LB media (the same media used for sub-surface  
306 twitching motility assays) compared to wildtype (Figure 1C). Specifically, *fliF*, *fliG* and *prlC*  
307 had a shorter lag time than wildtype, and *kinB* and *lon* had a longer lag time than wildtype,  
308 but all reached approximately the same final cell density (Figure 1C). Based upon these  
309 results a growth-related effect may account for some of the observed decrease in twitching  
310 motility for *kinB* and *lon*. However, the observed alterations in twitching motility for *prlC*,  
311 *PA14\_66580*, *pfpI*, *fliG*, *motY* and *algU* are not accounted for by growth related defects. Of  
312 these AlgU has already been implicated in regulation of twitching motility via what appears  
313 to be an indirect mechanism (24). To our knowledge none of the remaining targets *prlC*,  
314 *PA14\_66580*, *pfpI*, *fliG* and *motY* have been previously implicated in twitching motility in *P.*  
315 *aeruginosa*.

### 316 **Visualizing the T4P of novel twitching motility gene targets using TEM**

317 Alterations in twitching motility levels are commonly attributed to an increase or  
318 decrease in levels of expressed and/or assembled T4P and/or mislocalization of T4P. To  
319 determine whether the alterations in twitching motility of certain mutants result from  
320 abnormal levels or mislocalization of T4P, transmission electron microscopy (TEM) was  
321 used to visualize the pili. We investigated *prlC*, *PA14\_66580*, *pfpI* and *motY*, as a flagellum-  
322 related representative, as well as PA14 wildtype and *pilR*, as respective positive and negative  
323 controls (Figure 2). These experiments revealed that PA14 wildtype, *PA14\_66580*, *motY* and  
324 *prlC* possesses pili which were mainly polar (Figure 2A, C-G). Overall, the non-twitching

325 *pfpI* mutant (Figure 1A) had no observable T4P (Figure 2B), both *PA14\_66850* and *motY* had  
326 a reduced number of polar pili compared to wildtype (Figure 2C-D, F) and the hyper-  
327 twitching mutant *prlC* (Figure 1A) had extra-long pili, which in some cases appeared to  
328 intertwine with the observed flagella (Figure 2E) and an overall reduction in polar T4P levels  
329 compared to wildtype (Figure 2F). While PA14 wildtype, *PA14\_66850* and *prlC* were found  
330 to possess non-polar T4P in a few cases, there was no difference in the numbers of non-polar  
331 T4P in the mutant strains compared to wildtype (Figure 2G).

### 332 **Investigating the role of *PA14\_66580* in T4P assembly and function**

333 A clean deletion in *PA14\_66580* was generated in the orthologous gene (*PAK\_05353*  
334 with the gene product having 99.82 % amino acid identity to *PA14\_66580*) in the *P.*  
335 *aeruginosa* strain PAK. As was observed for the transposon mutant of *PA14\_66580* in PA14,  
336 a reduction in twitching motility was also observed in the PAK deletion mutant PAK05353  
337 (Figure 3A). *PA14\_66580/PAK\_05353* is encoded just upstream of the *pilMNOP* gene cluster  
338 which encodes the components in the alignment subcomplex, and the outer membrane  
339 associated secretin complex of PilP and PilQ which is involved in T4P outer membrane  
340 extrusion (11-14). Additionally, *PA14\_66580/PAK\_05353* is also annotated as a predicted  
341 ExeA-like protein. ExeA is an ATPase which binds peptidoglycan and is involved in  
342 transport and multimerization of ExeD into the outer membrane to form the functional  
343 secretin of the Type II secretion system (56). Given this, we hypothesized that  
344 *PA14\_66580/PAK\_05353* may be involved in multimerization and/or localization of the PilQ  
345 secretin complex. To investigate this we performed immunoblotting of whole cell lysates of  
346 wildtype, PAK05353 and PAK*pilQ* strains harvested from agar plates for both the multimeric  
347 and monomeric forms of PilQ (Figure 3B). This revealed that PAK05353 was able to form  
348 both multimers and monomers of PilQ to the same extent as wildtype indicating that  
349 PAK05353 does not appear to play a role in PilQ multimerization.

## 350 **Functional Gene Enrichment Analysis**

351 Enrichment analyses of genes that had increased or decreased mutant populations in  
352 the TraDIS output using the KEGG database (57) revealed that 3 key pathways were  
353 significantly altered. These were: flagella biosynthesis, two-component systems (TCS) and  
354 chemotaxis (Table S3 (increased population) and Table S4 (decreased population)).

355 We noticed that a number of flagella-associated structural and regulatory genes had  
356 altered mutant abundances following selection for twitching motility-mediated biofilm  
357 formation in our TraDIS assay, and some single mutants were confirmed to have significantly  
358 altered levels of twitching motility compared to wildtype (Figure 1A). Remarkably, this  
359 revealed a strong correlation between gene products predicted to have a negative effect on  
360 twitching motility (which corresponds to a positive log-fold change in our TraDIS output  
361 (Table S1), or a measured increase in twitching motility of the transposon mutant (Figure  
362 S2)) with proteins associated with the outer part of the cell envelope and thus the outer part of  
363 the flagellum body. In contrast, proteins associated with the inner part of the cell envelope  
364 and flagellum body were predicted to have a positive effect on twitching motility (which  
365 corresponds to a negative log-fold change in our TraDIS output (Table S1) or a measured  
366 decrease in twitching motility of the transposon mutant (Figure S2)) (Figure 4).

367 The chemotaxis pathway identified in our functional gene enrichment analysis  
368 included mutants of swimming chemotaxis (*che*) genes which appeared to promote  
369 (*cheA/B/Z/Y*) as well as inhibit (*cheR/W*) twitching motility-mediated biofilm formation. This  
370 suggests a balance between bacterial chemotaxis and twitching motility, especially as the  
371 chemotaxis pathway also controls flagella assembly. The TCS linked to twitching motility  
372 were mostly known genes, for instance *algZ/R* involved in alginate biosynthesis, or the *pil*  
373 genes in T4P production, but also included some unexpected genes related to osmotic

374 stability, such as *cusS/R* involved in copper efflux, or *dctA/B/D/P* for C4-dicarboxylate  
375 transport.

## 376 **Discussion**

377 In this study, we have successfully applied a physical separation-based TraDIS  
378 approach to identify genes involved in twitching motility-mediated biofilm formation in *P.*  
379 *aeruginosa*. Using this method, we could detect almost all genes currently known to be  
380 involved in T4P assembly and twitching motility, in addition to a large number of genes  
381 identified in our TraDIS output (Table S1) and a select group for further study (Table 2) not  
382 previously known to be involved.

383 A functional enrichment analysis of all genes that have altered mutant abundances in  
384 our assay identified 3 major groups of gene function that were affected during twitching  
385 motility: flagella assembly, bacterial chemotaxis and TCS. Perhaps the most interesting from  
386 these is the potential involvement of the flagella as suggested from the predicted (Table S1)  
387 or determined (Figure S2) differential effect of structural and regulatory flagella components  
388 on twitching motility. Specifically, we observed a strong correlation between gene products  
389 predicted to have a negative effect on twitching motility with proteins associated with the  
390 outer part of the flagella body, and in contrast, proteins associated with the inner part of the  
391 flagella body were predicted to have a positive effect on twitching motility (Figure 4). This is  
392 intriguing as it suggests a differential effect on twitching motility by flagella components  
393 based upon their cellular location and certainly warrants further investigation in future work.

394 For each of the 11 gene targets selected for further investigation (Table 2) the  
395 twitching motility phenotype was confirmed in a sub-surface stab assay, with growth assays  
396 performed to demonstrate that the observed twitching phenotype was not due to a growth  
397 defect. Submerged biofilm formation was also assayed which revealed that only *kinB* had a  
398 significant decrease in levels compared to wildtype (Figure 1B), demonstrating that our



399 TraDIS assay did indeed selectively identify genes specific for twitching motility-mediated  
400 biofilm expansion on a semi-solid surface. Overall these assays confirmed the twitching  
401 motility phenotype observed for *prlC*, *PA14\_66580*, *pfpI*, *fliG* and *motY* was not due simply  
402 to a growth related defect. For these mutants TEM was used to determine whether the  
403 twitching motility phenotype could be attributed to alterations in levels and/or localization of  
404 surface assembled T4P. No pili were observed in a *pfpI* mutant (Figure 2B), which explains  
405 the observed lack of twitching motility (Figure 1A). PfpI is an intracellular protease which  
406 affects antibiotic resistance, swarming motility and biofilm formation in *P. aeruginosa* (58)  
407 however, to our knowledge the current study is the first report to a role for PfpI in twitching  
408 motility. Given the established role of intracellular proteases in controlling levels of a range  
409 of chaperones and regulatory proteins it is likely that the protease activity of PfpI is required  
410 for control of regulators or other proteins involved in T4P biogenesis and/or assembly.

411 A role for PA14\_66580 was also investigated in the formation of the PilQ secretin to  
412 allow T4P extrusion and thus function. This was based upon the proximity of *PA14\_66580* to  
413 the *pilMNOP* operon, which encodes components that link the outer membrane PilQ secretin  
414 to the inner membrane motor complex. Additionally PA14\_66580 possesses the same  
415 conserved domain as ExeA (Uniprot: <http://www.uniprot.org/uniprot/A0A0H2ZID1>), which  
416 is an ATPase that binds peptidoglycan and is involved in transport and multimerization of  
417 ExeD into the outer membrane to form the secretin of the Type II secretion system (56). Our  
418 TEM data revealed that *PA14\_66580* had reduced numbers of pili compared to wildtype  
419 (Figure 2C, F), which correlates with the observed reduction in twitching motility in both  
420 PA14 and PAK strain backgrounds (Figure 1A and Figure 3A). Given that no difference in  
421 the expression of monomeric or multimeric PilQ was observed in a mutant of *PA14\_566580*  
422 in PAK (PAK05353) (Figure 3B), we suggest that the reduction in surface T4P and twitching  
423 motility levels is not due to a lack of secretin formation. PA14\_66580 could instead be

424 involved in stabilization of the secretin pore and/or formation of the assembly and motor  
425 subcomplexes in order to allow full functionality of the T4P.

426         A *prlC* mutant was found to have increased levels of twitching motility compared to  
427 wildtype (Figure 1A), a reduction in polar surface assembled T4P (Figure 2F) and to have a  
428 putative interaction between the surface-assembled flagella and T4P (Figure 2D). PrlC is  
429 uncharacterized in *P. aeruginosa* however it has an M3 peptidase domain (Pfam PF01432)  
430 which is associated with mammalian and bacterial oligopeptidases. The homologue in *E. coli*  
431 is a cytoplasmic protease (also named PrlC) which appears to be a partner in degradation of  
432 peptides produced by ATP-dependent proteases from multiple protein degradation pathways  
433 (59). A homologue of PrlC also exists in *Aeromonas hydrophilia*. A mutant of the  
434 oligopeptidase *pepF* was shown to have decreased swimming motility, increased biofilm  
435 formation in a crystal violet microtitre plate assay and increased attachment to epithelial cells  
436 (60). While the exact role of PepF has been not elucidated, this published data suggests that  
437 PepF could be involved in processing proteins involved in biogenesis or regulation of the  
438 polar flagella, used for swimming, or the bundle-forming pili (Bfp) or Type-IV *Aeromonas*  
439 pili (Tap) used for attachment. While it is unclear exactly how PrlC in *P. aeruginosa* is  
440 influencing twitching motility, our results suggest a similar role as for PepF in *A. hydrophilia*  
441 in processing proteins involved in biogenesis, assembly or regulation of the T4P.  
442 Alternatively, given the putative interaction of the flagella and T4P observed (Figure 2D),  
443 PrlC may be involved in processing flagella-associated proteins to ultimately affect the  
444 putative interaction between these two motility machines and thus the function of the T4P (as  
445 suggested from Figure 4).

446         We observed that a *motY* mutant had increased twitching motility levels (Figure 1A)  
447 but reduced levels of T4P (Figure 2A, F). MotY is a peptidoglycan binding protein which is  
448 required for MotAB-mediated flagella motor rotation and is associated with the outer-

449 membrane (61). While a *motY* mutant is severely impaired for flagella-mediated motility on  
450 semi-solid surfaces (swarming motility), there is only a slight decrease in levels of swimming  
451 motility compared to wildtype in liquid media (61). The *motY* mutant used in this study (47)  
452 has a transposon insertion in the centre of the protein, and thus lacks the C-terminus of the  
453 protein, which has been shown to be involved in stabilizing the association of MotY with the  
454 stator proteins MotAB to allow flagella rotation (62). Given the observed reduction in surface  
455 assembled pili (Figure 2A, F) and increase in twitching motility (Figure 1A) this suggests  
456 that, as discussed above, a defect in flagella function is likely affecting the function of the  
457 T4P to produce the observed twitching motility phenotype.

458 FliG is one of the proteins in the rotor-mounted switch complex (C ring), located at  
459 the base of the basal body in the cytoplasm, and is important for directing flagella rotation  
460 (30). We observed a decrease in twitching motility of *fliG* (Figure 1A). Deletion of the C-  
461 terminal region of FliG (as is the case for our *fliG* transposon mutant (47)) results in a strain  
462 which produces non-functional flagella (63). Thus we would predict that, as for *motY*, our  
463 *fliG* mutant would also have wildtype levels of assembled T4P, with the presence of non-  
464 functional flagella in *fliG* also potentially affecting function of the T4P in twitching motility.

465 This study has identified both known and novel components involved in twitching  
466 motility in *P. aeruginosa*. Additionally, we have provided analyses which suggest a  
467 differential effect of flagella proteins on T4P function based upon their cellular location and  
468 points towards a possible interaction between the flagella and T4P machines to influence  
469 twitching motility. Overall these results highlight the success of our TraDIS-based approach  
470 and point to a number of intriguing new players involved in twitching motility-mediated  
471 biofilm expansion in *P. aeruginosa*.

472

473

474 **Acknowledgements**

475 The Authors state that they have no conflict of interest.

476 L.M.N. is supported by MRC Grant MR/N023250/1 and a Marie Curie Fellowship (PIIF-GA-  
477 2013-625318). A.F. is supported by Medical Research Council (MRC) Grants  
478 MR/K001930/1 and MR/N023250/1 and Biotechnology and Biological Sciences Research  
479 Council (BBSRC) Grant BB/N002539/1. A.K.C and C.J.B were supported by the Medical  
480 Research Council (Grant G1100100/1). This work was supported by an MRC Centenary  
481 Award (Grant G1100189) and the Wellcome Trust (Grant WT098051).

482 The authors are grateful to Stephen Lory for gifting the clean deletion mutant of *PAK $\Delta$ *pilQ**  
483 and the  $\alpha$ -PilQ antibody and to Sandy Pernitzsch / Scigraphix for assistance with Figure 4.

484

485 **References**

- 486 1. Foundation CF. Cystic Fibrosis Foundation - Annual Report. CDC, 2012.
- 487 2. Van Delden C, Iglewski BH. Cell-to-cell signaling and *Pseudomonas aeruginosa*  
488 infections. *Emerg Infect Dis.* 1998;4(4):551-60.
- 489 3. Hospenthal MK, Costa TRD, Waksman G. A comprehensive guide to pilus biogenesis  
490 in Gram-negative bacteria. *Nature reviews Microbiology.* 2017;15(6):365-79.
- 491 4. Whitchurch CB. Biogenesis and Function of Type IV Pili in *Pseudomonas* Species.  
492 2006. In: *Pseudomonas Volume 4 Molecular Biology of Emerging Issues* [Internet]. Springer  
493 USA; [139-88].
- 494 5. Gloag ES, Turnbull L, Huang A, Vallotton P, Wang H, Nolan LM, et al. Self-  
495 organization of bacterial biofilms is facilitated by extracellular DNA. *Proceedings of the*  
496 *National Academy of Sciences of the United States of America.* 2013;110(28):11541-6.
- 497 6. Donlan RM, Costerton JW. Biofilms: Survival Mechanisms of Clinically Relevant  
498 Microorganisms. *Clinical Microbiology Reviews.* 2002;15(2):167-93.

- 499 7. Sabbuba N, Hughes G, Stickler DJ. The migration of *Proteus mirabilis* and other  
500 urinary tract pathogens over Foley catheters. *BJU international*. 2002;89(1):55-60.
- 501 8. Burrows LL. *Pseudomonas aeruginosa* twitching motility: type IV pili in action.  
502 *Annual review of microbiology*. 2012;66:493-520.
- 503 9. Chiang P, Habash M, Burrows LL. Disparate subcellular localization patterns of  
504 *Pseudomonas aeruginosa* Type IV pilus ATPases involved in twitching motility. *Journal of*  
505 *bacteriology*. 2005;187(3):829-39.
- 506 10. Takhar HK, Kemp K, Kim M, Howell PL, Burrows LL. The platform protein is  
507 essential for type IV pilus biogenesis. *The Journal of biological chemistry*.  
508 2013;288(14):9721-8.
- 509 11. Ayers M, Sampaleanu LM, Tammam S, Koo J, Harvey H, Howell PL, et al.  
510 PilM/N/O/P proteins form an inner membrane complex that affects the stability of the  
511 *Pseudomonas aeruginosa* type IV pilus secretin. *Journal of molecular biology*.  
512 2009;394(1):128-42.
- 513 12. Sampaleanu LM, Bonanno JB, Ayers M, Koo J, Tammam S, Burley SK, et al.  
514 Periplasmic domains of *Pseudomonas aeruginosa* PilN and PilO form a stable heterodimeric  
515 complex. *Journal of molecular biology*. 2009;394(1):143-59.
- 516 13. Tammam S, Sampaleanu LM, Koo J, Manoharan K, Daubaras M, Burrows LL, et al.  
517 PilMNOPQ from the *Pseudomonas aeruginosa* type IV pilus system form a transenvelope  
518 protein interaction network that interacts with PilA. *Journal of bacteriology*.  
519 2013;195(10):2126-35.
- 520 14. Leighton TL, Dayalani N, Sampaleanu LM, Howell PL, Burrows LL. Novel Role for  
521 PilNO in Type IV Pilus Retraction Revealed by Alignment Subcomplex Mutations. *Journal*  
522 *of bacteriology*. 2015;197(13):2229-38.

- 523 15. Nunn D, Bergman S, Lory S. Products of three accessory genes, *pilB*, *pilC*, and *pilD*,  
524 are required for biogenesis of *Pseudomonas aeruginosa* pili. *Journal of bacteriology*.  
525 1990;172(6):2911-9.
- 526 16. Whitchurch CB, Hobbs M, Livingston SP, Krishnapillai V, Mattick JS.  
527 Characterisation of a *Pseudomonas aeruginosa* twitching motility gene and evidence for a  
528 specialised protein export system widespread in eubacteria. *Gene*. 1991;101(1):33-44.
- 529 17. Whitchurch CB, Mattick JS. Characterization of a gene, *pilU*, required for twitching  
530 motility but not phage sensitivity in *Pseudomonas aeruginosa*. *Molecular microbiology*.  
531 1994;13(6):1079-91.
- 532 18. Alm RA, Boderer AJ, Free PD, Mattick JS. Identification of a novel gene, *pilZ*,  
533 essential for type 4 fimbrial biogenesis in *Pseudomonas aeruginosa*. *Journal of bacteriology*.  
534 1996;178(1):46-53.
- 535 19. Kaiser D. Bacterial motility: how do pili pull? *Current biology : CB*.  
536 2000;10(21):R777-80.
- 537 20. Merz AJ, So M, Sheetz MP. Pilus retraction powers bacterial twitching motility.  
538 *Nature*. 2000;407(6800):98-102.
- 539 21. Huang B, Whitchurch CB, Mattick JS. FimX, a Multidomain Protein Connecting  
540 Environmental Signals to Twitching Motility in *Pseudomonas aeruginosa*. *Journal of*  
541 *bacteriology*. 2003;185(24):7068-76.
- 542 22. Ishimoto KS, Lory S. Formation of pilin in *Pseudomonas aeruginosa* requires the  
543 alternative sigma factor (RpoN) of RNA polymerase. *Proceedings of the National Academy*  
544 *of Sciences of the United States of America*. 1989;86(6):1954-7.
- 545 23. Hobbs M, Collie ES, Free PD, Livingston SP, Mattick JS. PilS and PilR, a two-  
546 component transcriptional regulatory system controlling expression of type 4 fimbriae in  
547 *Pseudomonas aeruginosa*. *Molecular microbiology*. 1993;7(5):669-82.

- 548 24. Whitchurch CB, Alm RA, Mattick JS. The alginate regulator AlgR and an associated  
549 sensor FimS are required for twitching motility in *Pseudomonas aeruginosa*. Proceedings of  
550 the National Academy of Sciences of the United States of America. 1996;93(18):9839-43.
- 551 25. Darzins A. The *pilG* gene product, required for *Pseudomonas aeruginosa* pilus  
552 production and twitching motility, is homologous to the enteric, single-domain response  
553 regulator CheY. J Bacteriol. 1993;175(18):5934-44.
- 554 26. Darzins A. Characterization of a *Pseudomonas aeruginosa* gene cluster involved in  
555 pilus biosynthesis and twitching motility: sequence similarity to the chemotaxis proteins of  
556 enterics and the gliding bacterium *Myxococcus xanthus*. Mol Microbiol. 1994;11(1):137-53.
- 557 27. Darzins A. The *Pseudomonas aeruginosa pilK* gene encodes a chemotactic  
558 methyltransferase (CheR) homologue that is translationally regulated. Mol Microbiol.  
559 1995;15(4):703-17.
- 560 28. Whitchurch CB, Leech AJ, Young MD, Kennedy D, Sargent JL, Bertrand JJ, et al.  
561 Characterization of a complex chemosensory signal transduction system which controls  
562 twitching motility in *Pseudomonas aeruginosa*. Molecular microbiology. 2004;52(3):873-93.
- 563 29. Winther-Larsen HC, Koomey M. Transcriptional, chemosensory and cell-contact-  
564 dependent regulation of type IV pilus expression. Current opinion in microbiology.  
565 2002;5(2):173-8.
- 566 30. Wadhams GH, Armitage JP. Making sense of it all: bacterial chemotaxis. Nature  
567 reviews Molecular cell biology. 2004;5(12):1024-37.
- 568 31. Beatson SA, Whitchurch CB, Sargent JL, Levesque RC, Mattick JS. Differential  
569 Regulation of Twitching Motility and Elastase Production by Vfr in *Pseudomonas*  
570 *aeruginosa*. Journal of bacteriology. 2002;184(13):3605-13.

- 571 32. Wolfgang MC, Lee VT, Gilmore ME, Lory S. Coordinate regulation of bacterial  
572 virulence genes by a novel adenylate cyclase-dependent signaling pathway. *Dev Cell*.  
573 2003;4(2):253-63.
- 574 33. Whitchurch CB, Beatson SA, Comolli JC, Jakobsen T, Sargent JL, Bertrand JJ, et al.  
575 *Pseudomonas aeruginosa fimL* regulates multiple virulence functions by intersecting with  
576 Vfr-modulated pathways. *Molecular microbiology*. 2005;55(5):1357-78.
- 577 34. O'Toole GA, Gibbs KA, Hager PW, Phibbs PV, Jr., Kolter R. The global carbon  
578 metabolism regulator Crc is a component of a signal transduction pathway required for  
579 biofilm development by *Pseudomonas aeruginosa*. *Journal of bacteriology*. 2000;182(2):425-  
580 31.
- 581 35. Jain R, Sliusarenko O, Kazmierczak BI. Interaction of the cyclic-di-GMP binding  
582 protein FimX and the Type 4 pilus assembly ATPase promotes pilus assembly. *PLoS*  
583 *pathogens*. 2017;13(8):e1006594.
- 584 36. Buensuceso RNC, Daniel-Ivad M, Kilmury SLN, Leighton TL, Harvey H, Howell  
585 PL, et al. Cyclic AMP-Independent Control of Twitching Motility in *Pseudomonas*  
586 *aeruginosa*. *Journal of bacteriology*. 2017;199(16).
- 587 37. Cowles KN, Moser TS, Siryaporn A, Nyakudarika N, Dixon W, Turner JJ, et al. The  
588 putative Poc complex controls two distinct *Pseudomonas aeruginosa* polar motility  
589 mechanisms. *Molecular microbiology*. 2013;90(5):923-38.
- 590 38. Huang B, Ru K, Yuan Z, Whitchurch CB, Mattick JS. tonB3 is required for normal  
591 twitching motility and extracellular assembly of type IV pili. *Journal of bacteriology*.  
592 2004;186(13):4387-9.
- 593 39. Inclan YF, Huseby MJ, Engel JN. FimL Regulates cAMP Synthesis in *Pseudomonas*  
594 *aeruginosa*. *PloS one*. 2011;6(1):e15867.



- 595 40. Nolan LM, Beatson SA, Croft L, Jones PM, George AM, Mattick JS, et al. Extragenic  
596 suppressor mutations that restore twitching motility to fimL mutants of *Pseudomonas*  
597 *aeruginosa* are associated with elevated intracellular cyclic AMP levels. *MicrobiologyOpen*.  
598 2012;1(4):490-501.
- 599 41. Langridge GC, Phan MD, Turner DJ, Perkins TT, Parts L, Haase J, et al.  
600 Simultaneous assay of every *Salmonella Typhi* gene using one million transposon mutants.  
601 *Genome research*. 2009;19(12):2308-16.
- 602 42. Barquist L, Mayho M, Cummins C, Cain AK, Boinett CJ, Page AJ, et al. The TraDIS  
603 toolkit: sequencing and analysis for dense transposon mutant libraries. *Bioinformatics*  
604 (Oxford, England). 2016;32(7):1109-11.
- 605 43. Barquist L, Boinett CJ, Cain AK. Approaches to querying bacterial genomes with  
606 transposon-insertion sequencing. *RNA biology*. 2013;10(7):1161-9.
- 607 44. Gallagher LA, Shendure J, Manoil C. Genome-scale identification of resistance  
608 functions in *Pseudomonas aeruginosa* using Tn-seq. *mBio*. 2011;2(1):e00315-10.
- 609 45. Lee SA, Gallagher LA, Thongdee M, Staudinger BJ, Lippman S, Singh PK, et al.  
610 General and condition-specific essential functions of *Pseudomonas aeruginosa*. *Proceedings*  
611 *of the National Academy of Sciences of the United States of America*. 2015;112(16):5189-  
612 94.
- 613 46. Turner KH, Everett J, Trivedi U, Rumbaugh KP, Whiteley M. Requirements for  
614 *Pseudomonas aeruginosa* acute burn and chronic surgical wound infection. *PLoS genetics*.  
615 2014;10(7):e1004518.
- 616 47. Liberati NT, Urbach JM, Miyata S, Lee DG, Drenkard E, Wu G, et al. An ordered,  
617 nonredundant library of *Pseudomonas aeruginosa* strain PA14 transposon insertion mutants.  
618 *Proceedings of the National Academy of Sciences of the United States of America*.  
619 2006;103(8):2833-8.

- 620 48. Siehnel R, Traxler B, An DD, Parsek MR, Schaefer AL, Singh PK. A unique  
621 regulator controls the activation threshold of quorum-regulated genes in *Pseudomonas*  
622 *aeruginosa*. *Proceedings of the National Academy of Sciences of the United States of*  
623 *America*. 2010;107(17):7916-21.
- 624 49. Kaniga K, Delor I, Cornelis GR. A wide-host-range suicide vector for improving  
625 reverse genetics in gram-negative bacteria: inactivation of the *blaA* gene of *Yersinia*  
626 *enterocolitica*. *Gene*. 1991;109(1):137-41.
- 627 50. Hachani A, Allsopp LP, Oduko Y, Filloux A. The VgrG proteins are "a la carte"  
628 delivery systems for bacterial type VI effectors. *The Journal of biological chemistry*.  
629 2014;289(25):17872-84.
- 630 51. Watson AA, Mattick JS, Alm RA. Functional expression of heterologous type 4  
631 fimbriae in *Pseudomonas aeruginosa*. *Gene*. 1996;175(1-2):143-50.
- 632 52. Sambrook J, E. F. Fritsch, and T. Maniatis. *Molecular cloning: a laboratory manual*.  
633 2nd ed. ed. Cold Spring Harbor, N. Y: Cold Spring Harbor Laboratory Press; 1989.
- 634 53. Semmler AB, Whitchurch CB, Mattick JS. A re-examination of twitching motility in  
635 *Pseudomonas aeruginosa*. *Microbiology*. 1999;145 ( Pt 10):2863-73.
- 636 54. Robinson MD, McCarthy DJ, Smyth GK. edgeR: a Bioconductor package for  
637 differential expression analysis of digital gene expression data. *Bioinformatics*.  
638 2010;26(1):139-40.
- 639 55. Chand NS, Lee JS, Clatworthy AE, Golas AJ, Smith RS, Hung DT. The sensor kinase  
640 KinB regulates virulence in acute *Pseudomonas aeruginosa* infection. *Journal of*  
641 *bacteriology*. 2011;193(12):2989-99.
- 642 56. Li G, Miller A, Bull H, Howard SP. Assembly of the type II secretion system:  
643 identification of ExeA residues critical for peptidoglycan binding and secretin  
644 multimerization. *Journal of bacteriology*. 2011;193(1):197-204.

- 645 57. Kanehisa M, Furumichi M, Tanabe M, Sato Y, Morishima K. KEGG: new  
646 perspectives on genomes, pathways, diseases and drugs. *Nucleic acids research*.  
647 2017;45(D1):D353-d61.
- 648 58. Fernandez L, Breidenstein EB, Song D, Hancock RE. Role of intracellular proteases  
649 in the antibiotic resistance, motility, and biofilm formation of *Pseudomonas aeruginosa*.  
650 *Antimicrobial agents and chemotherapy*. 2012;56(2):1128-32.
- 651 59. Jain R, Chan MK. Support for a potential role of E. coli oligopeptidase A in protein  
652 degradation. *Biochemical and biophysical research communications*. 2007;359(3):486-90.
- 653 60. Du H, Pang M, Dong Y, Wu Y, Wang N, Liu J, et al. Identification and  
654 Characterization of an *Aeromonas hydrophila* Oligopeptidase Gene pepF Negatively Related  
655 to Biofilm Formation. *Front Microbiol*. 2016;7:1497.
- 656 61. Doyle TB, Hawkins AC, McCarter LL. The complex flagellar torque generator of  
657 *Pseudomonas aeruginosa*. *Journal of bacteriology*. 2004;186(19):6341-50.
- 658 62. Li N, Kojima S, Homma M. Sodium-driven motor of the polar flagellum in marine  
659 bacteria *Vibrio*. *Genes to cells : devoted to molecular & cellular mechanisms*.  
660 2011;16(10):985-99.
- 661 63. Lloyd SA, Tang H, Wang X, Billings S, Blair DF. Torque generation in the flagellar  
662 motor of *Escherichia coli*: evidence of a direct role for FliG but not for FliM or FliN. *Journal*  
663 *of bacteriology*. 1996;178(1):223-31.
- 664
- 665

666 **Table 1. TraDIS identifies genes known to be involved twitching motility.**

| Gene name | PA14 orthologue | Gene product                                      | TraDIS log-fold change* |
|-----------|-----------------|---------------------------------------------------|-------------------------|
| algR      | PA14_69470      | alginate biosynthesis regulatory protein AlgR     | -10.21                  |
| chpA      | PA14_05390      | ChpA                                              | -12.74                  |
| chpB      | PA14_05400      | ChpB                                              | +7.82                   |
| chpC      | PA14_05410      | putative chemotaxis protein methyltransferase     | -1.08 <sup>#</sup>      |
| crc       | PA14_70390      | catabolite repression control protein             | -12.78                  |
| fabF1     | PA14_25690      | beta-ketoacyl-acyl carrier protein synthase II    | -3.82                   |
| fimL      | PA14_40960      | pilin biosynthetic protein                        | -10.25                  |
| algZ      | PA14_69480      | alginate biosynthesis protein AlgZ/FimS           | -6.79                   |
| fimT      | PA14_60270.1    | type 4 fimbrial biogenesis protein FimT           | -1.24 <sup>#</sup>      |
| fimU      | PA14_60280      | type 4 fimbrial biogenesis protein FimU           | -12.53                  |
| fimV      | PA14_20860      | putative T4P pilus assembly protein FimV          | +1.04                   |
| fimX      | PA14_65540      | conserved hypothetical protein                    | -6.89                   |
| pocB      | PA14_25500      | conserved hypothetical protein                    | NA                      |
| pilA      | PA14_58730      | type IV pilin structural subunit                  | +0.86 <sup>#</sup>      |
| pilB      | PA14_58750      | type 4 fimbrial biogenesis protein PilB           | -8.85                   |
| pilC      | PA14_58760      | type 4 fimbrial biogenesis protein pilC           | -10.62                  |
| pilD      | PA14_58770      | type 4 prepilin peptidase PilD                    | -6.46                   |
| pilE      | PA14_60320      | type 4 fimbrial biogenesis protein PilE           | -9.70                   |
| pilF      | PA14_14850      | type 4 fimbrial biogenesis protein PilF           | -5.29                   |
| pilG      | PA14_05320      | type IV pili response regulator PilG              | -8.64                   |
| pilH      | PA14_05330      | type IV pilus response regulator PilH             | -3.17                   |
| pilI      | PA14_05340      | type IV pili signal transduction protein PilI     | -10.18                  |
| pilJ      | PA14_05360      | type IV pili methyl-accepting chemotaxis protein  | -7.73                   |
| pilK      | PA14_05380      | methyltransferase PilK                            | -0.18 <sup>#</sup>      |
| pilM      | PA14_66660      | type 4 fimbrial biogenesis protein PilM           | -6.22                   |
| pilN      | PA14_66650      | type 4 fimbrial biogenesis protein PilN           | -6.86                   |
| pilO      | PA14_66640      | type 4 fimbrial biogenesis protein PilO           | -11.35                  |
| pilP      | PA14_66630      | type 4 fimbrial biogenesis protein PilP           | -6.96                   |
| pilQ      | PA14_66620      | type 4 fimbrial biogenesis OM protein PilQ        | -6.20                   |
| pilR      | PA14_60260      | two-component response regulator PilR             | -12.27                  |
| pilS      | PA14_60250      | kinase sensor protein of two component regulatory | -6.48                   |
| pilT      | PA14_05180      | twitching motility protein PilT                   | -9.69                   |
| pilU      | PA14_05190      | twitching motility protein PilU                   | -8.54                   |
| pilV      | PA14_60280.1    | type 4 fimbrial biogenesis protein PilV           | -13.14                  |
| pilW      | PA14_60290      | type 4 fimbrial biogenesis protein PilW           | -8.71                   |
| pilX      | PA14_60300      | type 4 fimbrial biogenesis protein PilX           | -8.86                   |
| pilY1     | PA14_60310      | type 4 fimbrial biogenesis protein PilY1          | -7.56                   |
| pilY2     | PA14_60310.1    | type 4 fimbrial biogenesis protein PilY2          | -9.50                   |
| pilZ      | PA14_25770      | type 4 fimbrial biogenesis protein PilZ           | -9.03                   |
| ppk       | PA14_69230      | polyphosphate kinase                              | +3.94                   |
| rpoN      | PA14_57940      | RNA polymerase sigma-54 factor                    | NA                      |
| rpoS      | PA14_17480      | sigma factor RpoS                                 | -5.85                   |
| tonB3     | PA14_05300      | TonB3                                             | -7.53                   |
| vfr       | PA14_08370      | cyclic AMP receptor-like protein                  | -9.30                   |

\*A positive log-fold change indicates that the gene product has a negative effect on twitching motility, while a negative log-fold change has a positive effect on twitching motility; # result is not significant (Q-value is >0.05) but confirmed by visual inspection to have differential insertion levels during twitching motility-mediated biofilm expansion; NA – not assayed due to a minimal insertion density in these genes in our starting base library.

667  
668

669 **Table 2. Transposon mutants with increased or decreased TM compared to PA14**  
 670 **wildtype for further analysis.**

| PA14 transposon mutant* | PAO1 orthologue            | Functional class #                                                                                                                      | Description                               |
|-------------------------|----------------------------|-----------------------------------------------------------------------------------------------------------------------------------------|-------------------------------------------|
| PAMr_nr_mas_07_1:C3     | <i>prlC</i>                | Amino acid transport and metabolism                                                                                                     | Zn-dependent oligopeptidase               |
| PAMr_nr_mas_04_1:A9     | <i>lon</i>                 | Posttranslational modification, protein turnover, chaperones                                                                            | ATP-dependent Lon protease                |
| PAMr_nr_mas_07_1:D4     | <i>kinB</i>                | Signal transduction mechanisms                                                                                                          | Signal transduction histidine kinase      |
| PAMr_nr_mas_12_4:D5     | <i>cyaB</i>                | Signal transduction mechanisms                                                                                                          | Adenylate cyclase                         |
| PAMr_nr_mas_12_1:C6     | <i>pfpI</i>                | Bacterial-type flagellar swarming motility; cellular response to antibiotic; single-species biofilm formation                           | Intracellular protease                    |
| PAMr_nr_mas_05_1:H3     | <i>fliG</i>                | Cell motility                                                                                                                           | Flagellar motor switch protein            |
| PAMr_nr_mas_09_4:G3     | <i>fliF</i>                | Cell motility, intracellular trafficking, secretion, and vesicular transport                                                            | Flagellar basal body M-ring protein       |
| PAMr_nr_mas_07_1:C7     | <i>motB</i>                | Bacterial-type flagellar cell motility                                                                                                  | Flagellar motor protein                   |
| PAMr_nr_mas_10_2:F2     | <i>motY</i>                | Cell wall/membrane/envelope biogenesis                                                                                                  | Sodium-dependent flagellar system protein |
| PAMr_nr_mas_09_3:C3     | <i>algU</i>                | Sigma factor activity; negative regulation of bacterial-type flagellar cell motility; regulation of polysaccharide biosynthetic process | Sigma factor                              |
| PAMr_nr_mas_14_4:C8     | <i>PA5037 (PA14_66580)</i> | ATPase activity; Type II secretory pathway, component ExeA                                                                              | Hypothetical                              |

\* Plate and well for mutants from PA14 transposon mutant collection (Liberati et al. (2006)); # Colours denote mutants which have similar predicted functional classes for the gene product using Clusters of Orthologous Groups (COGs).

671

672 **Table 3. Oligonucleotides used in this study**

| Name     | Oligonucleotide 5'-3' sequence | Description                                                              |
|----------|--------------------------------|--------------------------------------------------------------------------|
| PA5037_1 | GCTGGCACTGGAGCCGACCG           | For deletion mutagenesis of PAK05353 (PA14_66580) in PAK/PAO1 - primer 1 |
| PA5037_2 | TCAATGCGCGCTGGTCATGGGACCTCA    | For deletion mutagenesis of PAK05353 (PA14_66580) in PAK/PAO1 - primer 2 |
| PA5037_3 | ATGACCAGCGCGCATTGATCCGACCTG    | For deletion mutagenesis of PAK05353 (PA14_66580) in PAK/PAO1 - primer 3 |
| PA5037_4 | CGGCTTTCACCGGGTCTCTGG          | For deletion mutagenesis of PAK05353 (PA14_66580) in PAK/PAO1 - primer 4 |
| PA5037_5 | CCTGGGCGGCGGCATC               | For deletion mutagenesis of PAK05353 (PA14_66580) in PAK/PAO1 - primer 5 |
| PA5037_6 | ATAGAAGGCGGCCAGGTCGGC          | For deletion mutagenesis of PAK05353 (PA14_66580) in PAK/PAO1 - primer 6 |

673

674

675 **Figure Legends**

676 **Figure 1. Characterization of twitching motility, biofilm and growth phenotypes for**  
677 **select transposon mutants.** (A) Sub-surface twitching motility-mediated interstitial biofilm  
678 expansion at agar/plastic interface after 24 h incubation at 37 °C is presented as the mean  
679 surface area in mm<sup>2</sup> ± standard error of the mean normalized against wildtype as obtained  
680 from 2 independent experiments performed in triplicate. Two-tailed student's t-test, \*  
681 (p<0.0005) compared to wildtype. (B) Submerged biofilm formation in 96-well microtitre  
682 plates after 18 h at 37 °C is presented as the mean OD<sub>600nm</sub> reading ± standard error of the  
683 mean of extracted crystal violet staining normalized against wildtype, from 4 independent  
684 experiments performed in triplicate. Two-tailed student's t-test, \* (p<0.005) compared to  
685 wildtype. (C) Growth rates were determined by incubation of transposon mutants at 37 °C for  
686 19 h in LB media. The growth rates for *prlC*, *lon*, *fliF*, *fliG* and *kinB* were significantly  
687 different (p<0.05) to wildtype (predicted by one-way ANOVA with Dunnett's multiple  
688 comparison test). Levels of growth for *kinB*, *cyaB*, *pfpI*, *motB*, *motY*, *algU* and *PA14\_66580*  
689 were not significantly different from PA14 wildtype (one-way ANOVA with Dunnett's  
690 multiple comparison test).

691

692 **Figure 2. Visualizing T4P assembly and localisation.** Representative images of (A)  
693 wildtype PA14, (B) a pili mutant *pilR*, (C) a *PA14\_66580* mutant, (D) a *motY* mutant, and (E)  
694 a *prlC* mutant are shown; (F-G) quantification of T4P at the polar or non-polar cellular  
695 region/cells. All pili visualized and included in our analyses were between 1-2 µm in length.  
696 *pfpI* cells were indistinguishable from *pilR* as represented in (B); a *prlC* mutant had longer  
697 T4P compared to wildtype and in some cases these pili appeared to interact with the flagella  
698 (potential interactions marked with white arrows) (E). In each image the pili are arrowed in  
699 black, with a black asterisk at any free ends and a white asterisk where the pili appear to join or

700 go under a cell membrane. Images are representative of triplicate grids imaged in biological  
701 triplicate. For each replicate of each strain at least 200 cells were visualised. In (F) Two-  
702 tailed student's t-test, \* ( $p < 0.05$ ) compared to wildtype; in (G) Two-tailed student's t-test, ns  
703 determined for all samples compared to wildtype: vs. PA14*pilR*  $p = 0.363$ , vs. PA14*ppfI*  $p =$   
704  $0.361$ , PA14\_66580  $p = 0.611$ , PA14*motY*  $p = 0.363$ , PA14*prlC*  $p = 1.000$ .

705

706 **Figure 3. Twitching motility and PilQ secretin phenotypes in PAK05353 (PA14\_66580**

707 **mutant).** (A) Subsurface twitching motility-mediated interstitial biofilm expansion at  
708 agar/plastic interface after 48 h incubation at 37 °C for PAK and clean deletion of  
709 PA14\_66580 in PAK (PAK05353) is presented as the mean surface area in  $\text{mm}^2 \pm$  standard  
710 error of the mean normalized against wildtype as obtained from 3 independent experiments  
711 performed in triplicate. Two-tailed student's t-test, \* ( $p < 0.0005$ ) compared to wildtype. (B)  
712 Immunoblot of PilQ from whole cell preparations of strains PAK, PAK05353 and PAK*pilQ*  
713 obtained from overnight (20 h) confluent lawns grown at 37 °C on LB agar plates. RNAP  
714 was used as a loading control.

715

716 **Figure 4. Relative log-fold change of transposon insertions in genes for flagella**

717 **components.** Gene products involved in flagella structure or regulation of flagella function  
718 are represented in this diagram. Genes which had a positive log fold change (which implies a  
719 negative effect on twitching motility) are coloured red, and are mostly located in the outer  
720 part of the cell envelope and flagellum body. Genes which had a negative log fold change  
721 (which implies a positive effect on twitching motility) are coloured blue and are mostly  
722 located in the inner part of the cell envelope and flagellum body. Output image generated  
723 from KEGG Mapper tool (<http://www.kegg.jp/kegg/mapper.html>).

724

725 **Supplementary Table Legends**

726 **Table S1. Full list of all gene hits obtained in TraDIS screen.** Table contains PA14 gene  
727 locus tag, gene name, annotated gene function, the logFC (log<sub>2</sub> fold change) in transposon  
728 insertions from mutants obtained from the inner (non-twitching) zone vs mutants obtained  
729 from the outer (active-twitching) motility zone, and the statistical q value for all replicates.

730 **Table S2. Full list of PA14 transposon mutants used in the current study.** PA14 mutants  
731 from the PA14 transposon mutant collection (47) with gene name, annotated gene function  
732 and the plate and well where the mutant was taken from in the collection.

733 **Table S3. Enrichment analyses of genes that had an increased mutant population in the**  
734 **TraDIS output.** KEGG database (57) was used to identify pathways enriched in mutants  
735 with increased mutant populations in the TraDIS output (Table S1).

736 **Table S4. Enrichment analyses of genes that had a decreased mutant population in the**  
737 **TraDIS output.** KEGG database (57) was used to identify pathways enriched in mutants  
738 with decreased mutant populations in the TraDIS output (Table S1).

739

740 **Supplementary Figure Legends**

741 **Figure S1.** (A) The transposon mutant pool was inoculated in the centre of an inverted agar  
742 plate and incubated for 72 h at 37 °C. Mutants were separated based upon their ability to  
743 undergo twitching motility-mediated biofilm expansion away from the inoculation site. After  
744 72 hrs mutants were harvested from the inner non-motile region (outlined in white) and the  
745 outer active twitching edge (outlined in black). Genomic DNA was extracted from each pool  
746 of mutants and sequenced using a mass parallel approach. (B) Growth rates in minimal  
747 media for 11 selected transposon mutants assayed for a submerged biofilm defect in Figure  
748 1B. Growth rates were determined by incubation of transposon mutants at 37 °C for 19 h in



749 M63 minimal media (same media used for submerged biofilm assays). There was no  
750 significant difference between growth rates of transposon mutants compared to wildtype  
751 predicted by a one-way ANOVA with Dunnett's multiple comparison test. Data are  
752 represented as the mean  $\pm$  standard deviation for 2 independent replicates performed in  
753 triplicate.

754

755 **Figure S2. Twitching motility of selected transposon mutant targets identified using**

756 **TraDIS.** Sub-surface twitching motility-mediated interstitial biofilm expansion at  
757 agar/plastic interface after 24 h incubation at 37 °C is presented as the average surface area in  
758 mm<sup>2</sup>  $\pm$  standard deviation normalized against wildtype as obtained from 2 independent  
759 experiments performed in triplicate.

760

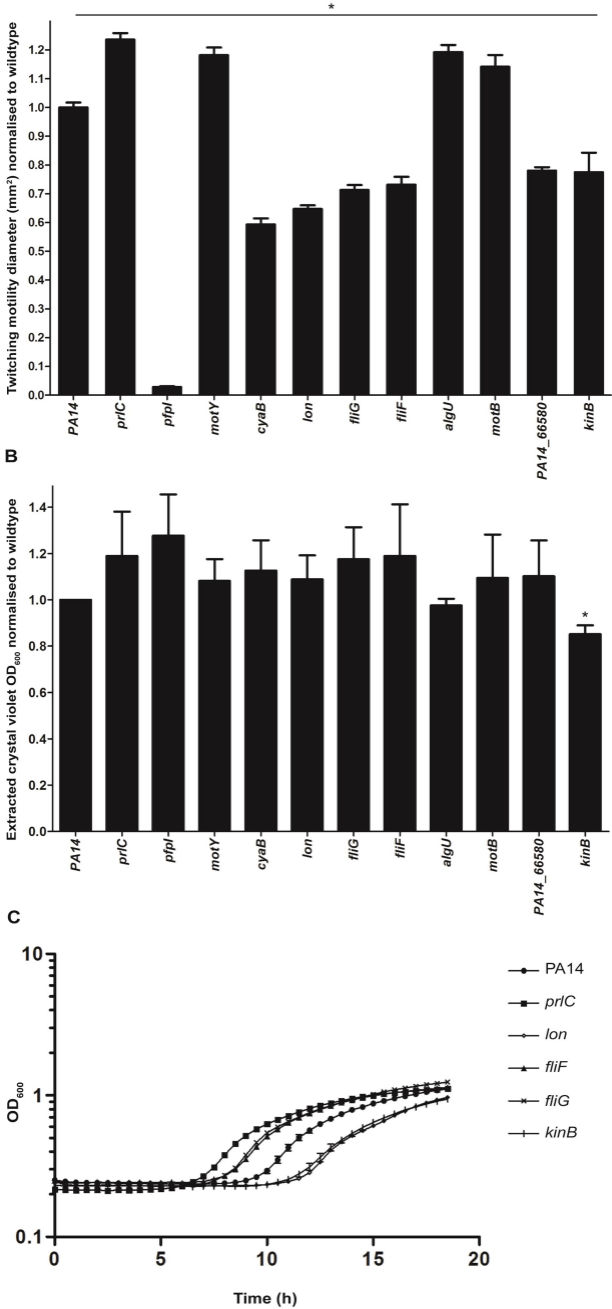

**Figure 1. Characterization of twitching motility, biofilm and growth phenotypes for select transposon mutants.** (A) Sub-surface twitching motility-mediated interstitial biofilm expansion at agar/plastic interface after 24 h incubation at 37 °C is presented as the mean surface area in mm<sup>2</sup> ± standard error of the mean normalized against wildtype as obtained from 2 independent experiments performed in triplicate. Two-tailed student's t-test, \* (p<0.0005) compared to wildtype. (B) Submerged biofilm formation in 96-well microtitre plates after 18 h at 37 °C is presented as the mean OD<sub>600nm</sub> reading ± standard error of the mean of extracted crystal violet staining normalized against wildtype, from 4 independent experiments performed in triplicate. Two-tailed student's t-test, \* (p<0.005) compared to wildtype. (C) Growth rates were determined by incubation of transposon mutants at 37 °C for 19 h in LB media. The growth rates for *prlC*, *lon*, *fliF*, *fliG* and *kinB* were significantly different (p<0.05) to wildtype (predicted by one-way ANOVA with Dunnett's multiple comparison test). Levels of growth for *kinB*, *cyaB*, *pfpl*, *motB*, *motY*, *algU* and PA14\_66580 were not significantly different from PA14 wildtype (one-way ANOVA with Dunnett's multiple comparison test).

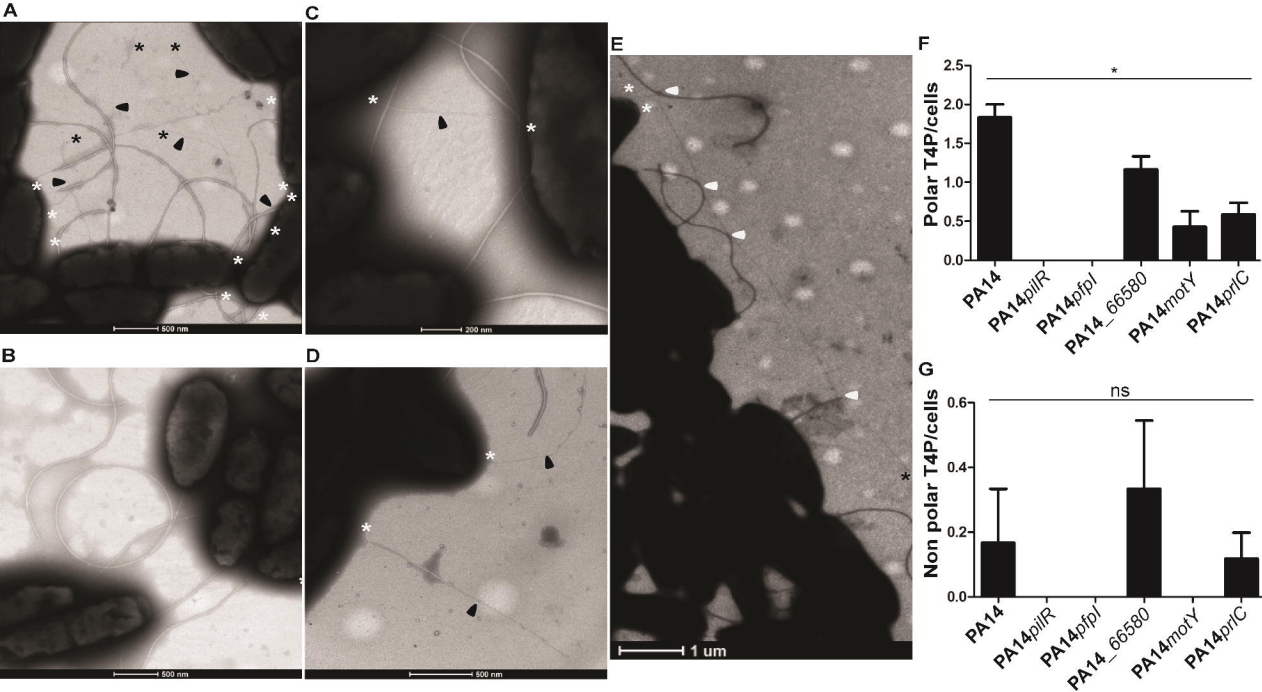

**Figure 2. Visualizing T4P assembly and localization.** Representative images of (A) wildtype PA14, (B) a *pilR* mutant, (C) a *PA14\_66580* mutant, (D) a *motY* mutant, and (E) a *prlC* mutant are shown; (F-G) quantification of T4P at the polar or non polar region of cell per numbers per cells. All pili included in our analyses were between 1-2  $\mu\text{m}$  in length. *pfpl* cells were indistinguishable from *pilR* as represented in (B); a *prlC* mutant had longer T4P compared to wildtype and in some cases these pili appeared to interact with the flagella (potential interactions marked with black arrows) (E). In each image the pili are arrowed in black, with a black asterisk at any free ends and a white asterisk where the pili appear to join or go under a cell membrane. Images are representative of triplicate grids imaged in biological triplicate. For each replicate of each strain at least 200 cells were visualised. In (F) Two-tailed student's t-test, \* ( $p < 0.05$ ) compared to wildtype; in (G) Two-tailed student's t-test, ns determined for all samples compared to wildtype: vs. *PA14pilR*  $p = 0.363$ , vs. *PA14pfpl*  $p = 0.361$ , *PA14\_66580*  $p = 0.611$ , *PA14motY*  $p = 0.363$ , *PA14prlC*  $p = 1.000$ .

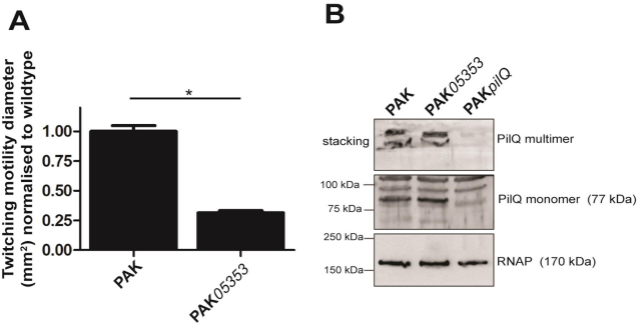

**Figure 3. Twitching motility and PilQ secretion phenotypes of PAK05353.**

(A) Subsurface twitching motility-mediated interstitial biofilm expansion at agar/plastic interface after 48 h incubation at 37 °C for PAK and clean deletion of PA14\_66580 in PAK (PAK05353) is presented as the mean surface area in mm<sup>2</sup> ± standard error of the mean normalized against wildtype as obtained from 3 independent experiments performed in triplicate. Two-tailed student's t-test, \* ( $p < 0.0005$ ) compared to wildtype. (B) Immunoblot of PilQ from whole cell preparations of strains PAK, PAK05353 and PAKpilQ obtained from overnight (20 h) confluent lawns grown at 37 °C on LB agar plates. RNAP was used as a loading control.

## Flagellar Assembly

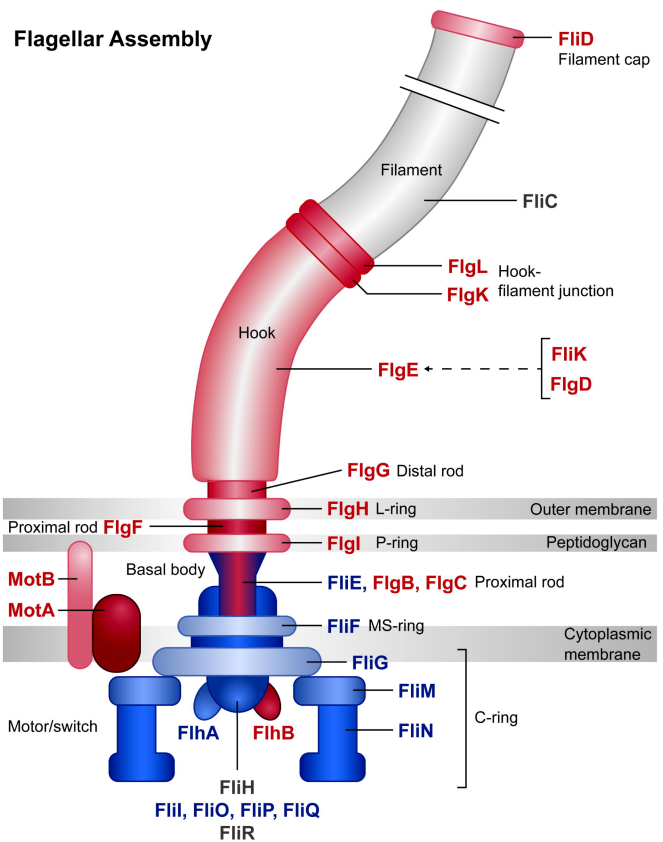

**Figure 4. Relative log-fold change of transposon insertions in genes for flagella components.** Gene products involved in flagella structure or regulation of flagella function are represented in this diagram. Genes which had a positive log fold change (which implies a negative effect on twitching motility) are coloured red, and are mostly located in the outer part of the cell envelope and flagellum body. Genes which had a negative log fold change (which implies a positive effect on twitching motility) are coloured blue and are mostly located in the inner part of the cell envelope and flagellum body. Output image generated from KEGG Mapper tool (<http://www.kegg.jp/kegg/mapper.html>).

A

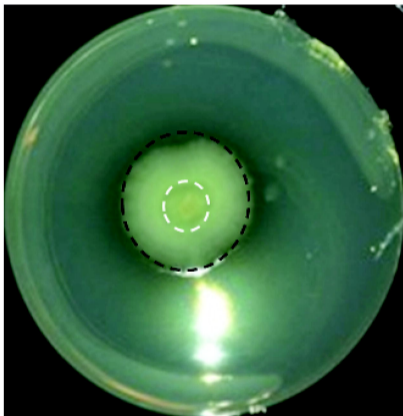

Fig S1

B

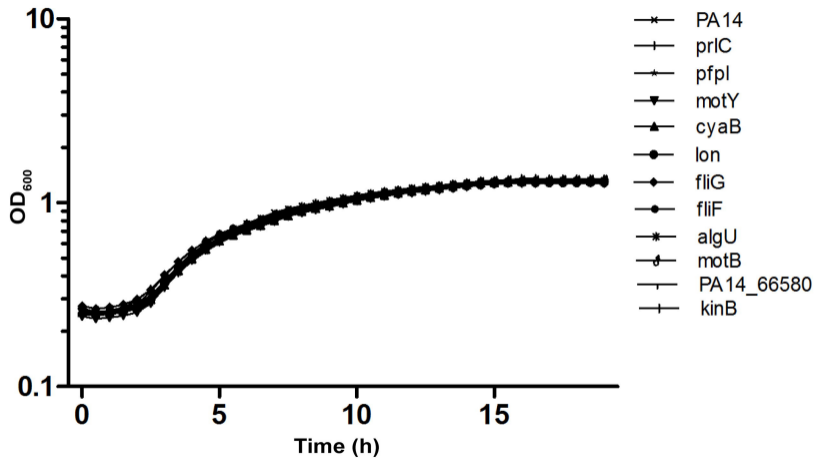

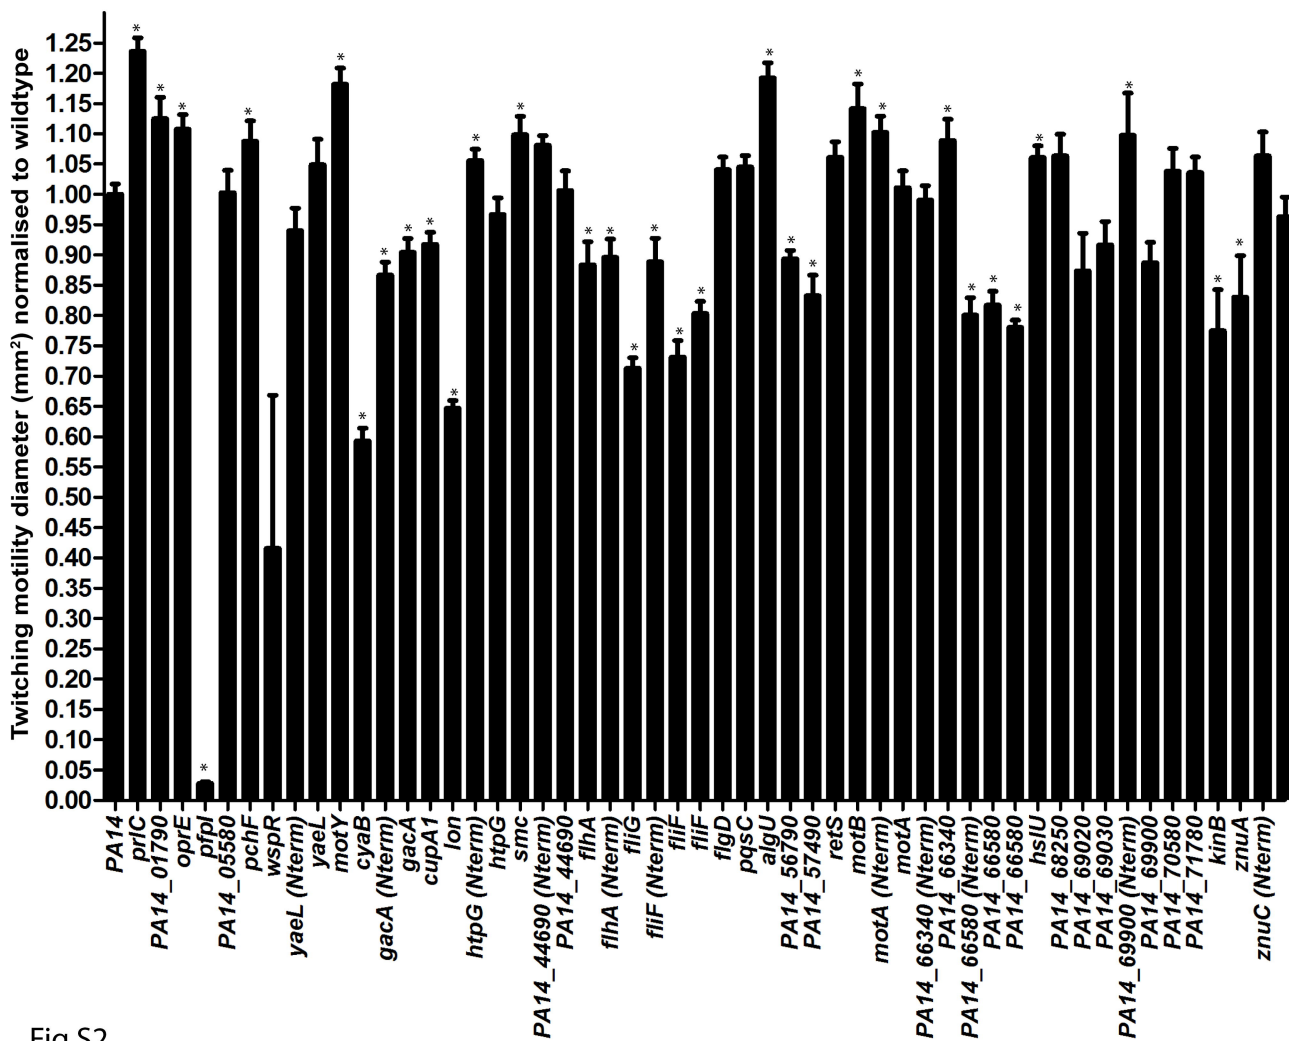

Fig S2
